# Supplementary material
Source: PubMed Central journal article supplement (PMC2614722)
Supplement: 0801789105_Appendix_PDF.pdf [file 0801789105_Appendix_PDF.pdf]

## SI Appendix

### Appendix 1

Table S1. Summary of observed effects

| Group                    | Category                                      | Variable                       | Motion               |                     | Navigation       |              |
|--------------------------|-----------------------------------------------|--------------------------------|----------------------|---------------------|------------------|--------------|
|                          |                                               |                                | <i>H</i>             | <i>D</i>            | <i>H</i>         | <i>D</i>     |
| <i>r</i>                 | Geography                                     | Terrain ruggedness             | -0.0006 (0.00036)    | NS                  | 0.070 (0.024)    | 0            |
|                          |                                               | Latitude                       | NS <sup>†</sup>      | NS                  | -2.7 (0.596)**   | NS           |
|                          | Meteorology                                   | Turbulence kinetic energy      | 0.085 (0.034)        | 0.640 (0.11)        | -6.48 (2.49) *** | NS           |
|                          |                                               | Vertical wind velocity         | NS **                | NS***               | NS***            | NS           |
|                          |                                               | Horizontal wind speed          | NS                   | -0.12 (0.047)       | 1.43 (0.81)      | NS           |
|                          |                                               | Horizontal wind direction      | NS                   | NS**                | NS <sup>†</sup>  | NS           |
|                          |                                               | Cloud top height               | NS                   | 0.0001 (0.00005) ** | NS               | NS           |
| <i>u<sub>t</sub></i>     | Motion-navigation effects                     | Distance (Motion)              |                      |                     | -0.657 (0.179)   | 0.13 (0.055) |
|                          |                                               | Bearing deviation (Navigation) | -0.0018 (0.00044)    | 0.234 (0.089)       | ***              | **           |
|                          | Past behavior                                 | Altitude at start              | 0.00036 (0.00009)*** | NS**                | NS               | NS           |
|                          |                                               | Speed at start                 | 0.0068 (0.001)***    | NS                  | NS               | NS           |
| Auto-regressivity        | Past position---AR(1) correlation coefficient | ***                            | 0.48                 | 0.33                | 0.32             |              |
| <i>r × u<sub>t</sub></i> | Interactions                                  | Terrain Ruggedness:TKE         | -0.00068 (0.00022)   | NS                  | NS               | NS           |

Variables are divided into three categorical groups: external factors (*r*), temporal factors (*u<sub>t</sub>*), and their interaction (*r × u<sub>t</sub>*). Motion is measured using distance as a dependent variable, and navigation is measured using angular deviation from a local mean. The influence of past positions was assessed through auto-regressive integrated moving average modeling for the correlation structure. All other variables were independent main effects. Angle models used degrees, and negative coefficients indicate less deviation and thus a straighter path. All two way interactions within and between the external effects and temporal variables were tested. The only significant interaction was between terrain

ruggedness and TKE. Information is organized as follows: parameter estimate (standard error) significance. NS, not significant; [dagger],  $P$  [lt] 0.1; \*,  $P$  [lt] 0.05; \*\*,  $P$  [lt] 0.01; \*\*\*,  $P$  [lt] 0.001.

## Appendix 2

| Movement ecology interactions                                         | Hourly scale                                                                                                                                                        | Daily scale                                                                                                                                                           | Annual scale                                                                                                                                              |
|-----------------------------------------------------------------------|---------------------------------------------------------------------------------------------------------------------------------------------------------------------|-----------------------------------------------------------------------------------------------------------------------------------------------------------------------|-----------------------------------------------------------------------------------------------------------------------------------------------------------|
| Effects of external factors ( $r$ ) on motion capacity ( $\Omega$ )   | Winds and turbulence (1), sociality (drafting for thermal discovery (2, 3))                                                                                         | Weather fronts, ridges, and troughs determine winds and turbulence available (1, 4). Food availability affects refueling decision.                                    | Climate change alters the availability and timing of weather patterns (5).                                                                                |
| Effects of external factors ( $r$ ) on navigation capacity ( $\Phi$ ) | Sensory information like light and olfaction (6, 7) affect spatial knowledge and route choice.                                                                      | Weather patterns will allow both adaptive wind drift and wind drift correction to influence routes (8, 9)                                                             | Long term trends in habitat and weather will determine timing; natal dispersal as well as later dispersal events will affect migratory route choice (10). |
| Effects of internal state ( $w$ ) on motion capacity ( $\Omega$ )     | Fat stores, circulating metabolites, and muscular fatigue determine costs of flight (1). Costs of movement determine distances (11).                                | Organ condition (12, 13) and hormonal states will regulate the impulse to continue flight (1).                                                                        | Age and experience lead to optimized decisions on distance and timing (8, 14).                                                                            |
| Effects of internal state ( $w$ ) on navigation capacity ( $\Phi$ )   | Energy state will determine a shift from migratory behavior to local food searching and roost locating. Behaviors such as aerial foraging mediate this process (2). | Decisions on length of stopovers, the lengths of paths between stopovers, and the degree of foraging within the migratory journey are all mediated by internal state. | Birds optimize route choice through experience (15). Previous dispersal events affect routes (10).                                                        |

1. Newton I (2008) *The Migration Ecology of Birds* (Academic, New York).
2. Bildstein KL (2006) *Migrating Raptors of the World: Their Ecology and Conservation* (Cornell Univ Press, Ithaca, NY).
3. Pennycuik CJ (1998) Field observations of thermals and thermal streets, and the theory of cross-country soaring flight. *J Avian Biol* 29:33-43.
4. Allen PE, Goodrich LJ, Bildstein KL (1996) Within- and among-year effects of cold fronts on migrating raptors at Hawk Mountain, Pennsylvania, 1934-1991. *Auk* 113: 329-338.
5. Root, *et al.* (1998) Fingerprints of global warming on wild plants and animals. *Nature* 421:57-60.
6. Waldvogel JA (1989) Olfactory orientation by birds. *Curr Ornithol* 6:269-321.
7. Kerlinger P (1989) *Flight Strategies of Migrating Hawks* (Chicago Univ Press, Chicago), pp 374.
8. Thorup K, Alerstam T, Hake M, Kjellén N (2006) Traveling or stopping of migrating birds in relation to wind: An illustration for the osprey. *Behavioural Ecol* 17:497-502.
9. Alerstam T (1990) *Bird migration* (Cambridge Univ Press, Cambridge, UK)

10. Winkler DW (2005) in *Birds of Two Worlds: Ecology and Evolution of Migration*, eds Greenberg R, Marra PP (Johns Hopkins Univ Press, Baltimore), pp 401-413.
11. Wikelski M, Tarlow E, Raim A, Diehl RH, Larkin RP, Visser GH. 2003. Costs of migration in free-flying songbirds. *Nature* 423, 703-704.
12. Lindström, Å (1997) Basal metabolic rates of migrating waders in the Eurasian Arctic. *J Avian Biol* 28:87-92.
13. Van Gils, JA, Dekinga A, Spaans B, Vahl WK, Piersma T (2005) Digestive bottleneck affects foraging decisions in red knots *Calidrius canutus*. II. Patch choice and length of working day. *J Animal Ecol* 74:120-130.
14. Hedenstrom A, Alerstam T (1995) Optimal flight speed of birds. *Phil Trans R Soc London Ser B* 348:471-487.
15. Shamoun-Baranes J, Leshem Y, Yom-Tov Y, Liechti O (2003) Differential use of thermal convection by soaring birds over central Israel. *Condor* 105:208-218.

### Appendix 3

#### Summary tables for linear mixed effects models describing movement and navigation decision functions

##### Hourly Movement Model

Log(Distance) ~ altitude + speed + bearing deviation + terrain ruggedness + TKE + terrain ruggedness \* TKE

Random effect = ~1|Bird/Migratory Event; (Intercept-only random effect structured with bird as highest level, and migratory event beneath this)

Standard Deviation: 7.2e-05 (intercept), 0.59 (residual)

No random effects were significant in model comparison across all analyses.

Correlation structure = ARIMA(1,0,0); Phi (correlation coefficient) = 0.446;  
Degrees of Freedom = 708;

| Variable               | Value    | SE       | <i>t</i> | <i>P</i> |
|------------------------|----------|----------|----------|----------|
| (Intercept)            | 2.199    | 0.067    | 32.9     | 0.0000   |
| Altitude               | 0.000363 | 0.000091 | 3.97     | 0.0001   |
| Speed                  | 0.006782 | 0.001003 | 6.59     | 0.0000   |
| Bearing deviation      | -0.00177 | 0.000435 | -4.06    | 0.0001   |
| Terrain ruggedness     | -0.00061 | 0.000358 | -1.71    | 0.0872   |
| TKE                    | 0.085413 | 0.033559 | 2.55     | 0.0111   |
| Terrain ruggedness*TKE | -0.00067 | 0.000224 | -3.02    | 0.0026   |

Derived Equations of Movement:

Log(Distance) = .446\* Log(Distance)<sub>t-1</sub> + .00036\*Altitude + .0068\*Speed + -0.0017 \*  
Bearing deviation + -0.00061\*Terrain Ruggedness + .085\*TKE + -0.00067\*Terrain  
Ruggedness\*TKE

### Daily Movement Model

Log(Distance) ~ bearing deviation + TKE + cloud top + horizontal wind strength + food

Random effect = ~1|Bird/Migratory Event;  
Standard Deviation: 7.1e-05 (intercept), 1.34 (residual)

Correlation structure = ARIMA(1,0,0); Phi = 0.336;  
Degrees of Freedom = 137;

| Variable          | Value    | SE        | <i>t</i> | <i>P</i> |
|-------------------|----------|-----------|----------|----------|
| (Intercept)       | 0.791    | 0.799     | 0.99     | 0.3237   |
| Bearing deviation | 0.234    | 0.0896    | 3.97     | 0.0001   |
| TKE               | 0.640    | 0.110     | 6.59     | 0.0000   |
| Cloud top         | 0.000129 | 0.0000512 | -4.06    | 0.0001   |
| Wind strength     | -0.120   | 0.0467    | -1.71    | 0.0872   |

#### Derived Equation of Movement:

Log(Distance) = .336\* Log(Distance)<sub>t-1</sub> + .234\*Bearing deviation + .64\*TKE +  
.00013\*cloud top height + -0.12\*Wind Strength

### Hourly Navigation Model

Bearing Deviation ~ latitude + log(distance) + terrain ruggedness + TKE + horizontal wind strength

Random effect = ~1|Bird/Migratory Event;  
Standard Deviation: 0.0037 (intercept), 50.1 (residual)

Correlation structure = ARIMA(1,0,0); Phi=0.48;  
Degrees of Freedom = 709;

| Variable           | Value  | Std. Error | t-value | p-value |
|--------------------|--------|------------|---------|---------|
| (Intercept)        | 161.   | 22.1       | 7.29    | 0.0000  |
| Latitude           | -2.70  | 0.596      | -4.54   | 0.0000  |
| Distance           | -0.657 | 0.180      | -3.66   | 0.0003  |
| Terrain ruggedness | 0.0696 | 0.0245     | 2.84    | 0.0046  |
| TKE                | -6.48  | 2.49       | -2.60   | 0.0095  |
| Wind Strength      | 1.43   | 0.812      | 1.76    | 0.0794  |

Bearing Deviation = .48\* Bearing Deviation<sub>t-1</sub> + -2.7\*Latitude + -0.657\*Distance + .07\*Terrain Ruggedness + -6.48\*TKE + 1.43\*Wind Strength

Daily Navigation Model

Bearing Deviation ~ log(distance) + food

Random effect = ~1|Bird/Migratory Event;  
Standard Deviation: 7.41e-05 (intercept), 1.08 (residual)

Correlation structure = ARIMA(1,0,0); Phi=0.262;  
Degrees of Freedom = 140

| Variable    | Value | Std. Error | t-value | p-value |
|-------------|-------|------------|---------|---------|
| (Intercept) | 1.40  | 0.200      | 7.00    | 0.0000  |
| Distance    | 0.131 | 0.0552     | 2.37    | 0.0189  |

Derived Equation of Motion:

$$\text{Bearing Deviation} = .262 * \text{Bearing Deviation}_{t-1} + 1.4 * \text{Distance}$$



#### **Appendix 4**

In the U.S., Turkey Vultures were captured on the carcasses of roadkilled deer (*Odocoileus virginianus*) and groundhogs (*Marmota monax*). Padded leghold traps that had been modified by the removal of one spring and the addition of foam-tube padding, were set around carcasses. Traps were monitored from a blind, and birds were removed from traps immediately upon capture. In Canada, birds were caught by hand on the nest in abandoned farmhouses in Saskatchewan. Vultures were fitted with a solar GPS transmitter (Microwave Telemetry, 70 g) using a sewn harness of teflon ribbon. Transmitters were attached with unwaxed dental floss, which will naturally rot away after several seasons (E. Henkel, personal communication). To measure heart rate in a subset of birds, heart-rate loggers (A.J. Woakes; Biometistics) were implanted peritoneally and held in place using silk threads sewn into subcutaneous fat. All captured and tagged birds were offered dead mice, and were released within 24 hours. There was no visible effect of capture on behavior after 2-3 days.

GPS locations have a published accuracy of 15 meters for horizontal and vertical locations.
